# Supplementary material for: Dopant-induced changes of local structures for adjusting the hydration ability of proton-conducting lanthanum scandates
Source: Royal Society of Chemistry journal article supplement (doi:10.1039/d3ta03673a), 2023-01-01
Supplement: d3ta03673a1.pdf [file d3ta03673a1.pdf]

## **Dopant-Induced Changes of Local Structure for Adjusting the Hydration Ability of Proton-Conducting Lanthanum Scandates**

Semyon A. Belyakov<sup>1,\*</sup>, Alyona S. Lesnichyova<sup>1,3</sup>, Maksim S. Plekhanov<sup>2</sup>, Nils Prinz<sup>2</sup>, Mirijam Zobel<sup>2</sup>, Alexander S. Vokhmintsev<sup>3</sup>, Ilya A. Weinstein<sup>3,4</sup>

<sup>1</sup> Institute of High-Temperature Electrochemistry UB RAS, Yekaterinburg 620137, Russia

<sup>2</sup> Institute of Crystallography, RWTH Aachen University, Aachen 52066, Germany

<sup>3</sup> NANOTECH Centre, Ural Federal University, Yekaterinburg, 620002, Russia

<sup>4</sup> Institute of Metallurgy UB RAS, Yekaterinburg 620016, Russia

\* Corresponding author: [bca2@mail.ru](mailto:bca2@mail.ru)

## Partial Conductivities

The total conductivity of  $\text{La}_{0.95}\text{M}_{0.05}\text{ScO}_{3-\delta}$  ( $\text{M} = \text{Ca}, \text{Sr}, \text{Ba}$ ) as a function of  $p\text{O}_2$  in a dry ( $p\text{H}_2\text{O} = 0.1 \text{ kPa}$ ) and wet ( $p\text{H}_2\text{O} = 2.8 \text{ kPa}$ ) atmosphere was measured by the 4-probe DC method and is shown in Fig. S1. Under air conditions, the conductivity contains three contributions:

$$\sigma_t = \sigma_H + \sigma_O + \sigma_h, \quad (1)$$

where  $\sigma_H$ ,  $\sigma_O$  and  $\sigma_h$  are the proton, oxygen-ion and hole conductivities, respectively.

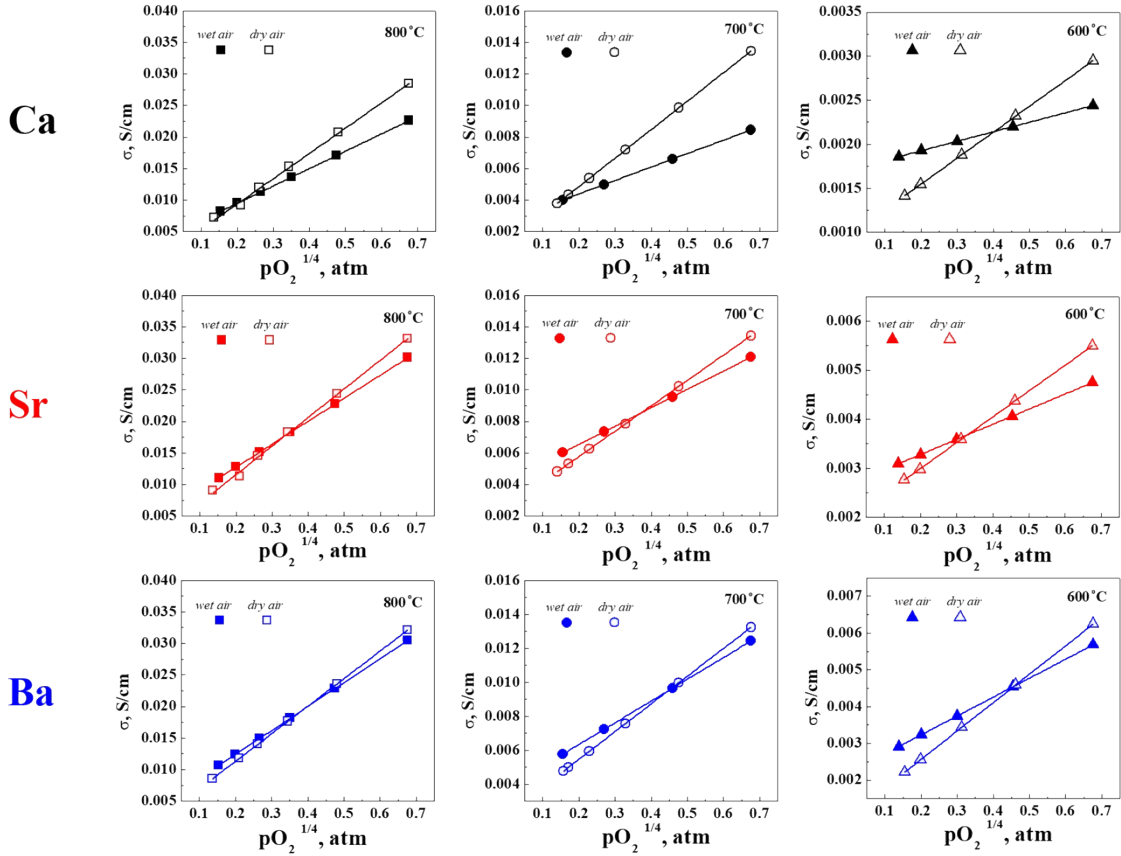

**Fig. S1** Total conductivity vs.  $p\text{O}_2^{1/4}$  dependencies for  $\text{La}_{0.95}\text{M}_{0.05}\text{ScO}_{3-\delta}$  ( $\text{M} = \text{Ca}, \text{Sr}, \text{Ba}$ )

Frade<sup>1</sup> and Baek<sup>2</sup> proposed an approach for calculating partial conductivities based on slope analysis of  $\sigma = f(p\text{O}_2)$  dependencies. This approach implies the independence of the mobility of charge carriers on the concentration of components of the gas phase. The following relations are obtained for partial conductivities:

$$\sigma_H = \sigma_H^* \left( \left( 1 + \frac{\alpha}{p\text{H}_2\text{O}} \right)^{1/2} - 1 \right) \frac{p\text{H}_2\text{O}}{[(1 + \alpha)^{1/2} - 1]}, \quad (2)$$

$$\sigma_O = \sigma_O^* \left( \left( 1 + \frac{\alpha}{p\text{H}_2\text{O}} \right)^{1/2} - 1 \right)^2 \frac{p\text{H}_2\text{O}}{\alpha}, \quad (3)$$

$$\sigma_h = \sigma_h^* \left( \left( 1 + \frac{\alpha}{pH_2O} \right)^{1/2} - 1 \right) \left( \frac{pH_2O}{\alpha} \right)^{1/2} pO_2^{1/4}, \quad (4)$$

where  $\sigma_H^*$  is protonic conductivity at  $pH_2O = 1$  atm,  $\sigma_O^*$  is oxygen-ion conductivity at  $pH_2O = 0$  atm and  $\sigma_h^*$  is hole conductivity at  $pO_2 = 1$  atm and  $pH_2O = 0$  atm. The value of  $\alpha$  is equal to:

$$\alpha = \frac{8x_{eff}}{K_H}, \quad (5)$$

where  $x_{eff}$  is the saturation limit for hydration or effective concentration of the dopant in the positions of La and  $K_H$  is the equilibrium constants of hydration.

Based on equation (7), we can find  $\sigma_h$  as the slope of the experimental dependence  $\sigma_t = f(pO_2)^{1/4}$ . The  $\alpha$  value can be calculated by combining two equations (4) for two humidity values and obtaining the following equation:

$$\frac{\sigma_h^{(1)}}{\sigma_h^{(2)}} = \frac{\sigma_h^* \left( \left( 1 + \frac{\alpha}{pH_2O^{(1)}} \right)^{1/2} - 1 \right) \left( \frac{pH_2O^{(1)}}{\alpha} \right)^{1/2}}{\sigma_h^* \left( \left( 1 + \frac{\alpha}{pH_2O^{(2)}} \right)^{1/2} - 1 \right) \left( \frac{pH_2O^{(2)}}{\alpha} \right)^{1/2}} = \frac{\left( 1 + \frac{pH_2O^{(1)}}{\alpha} \right)^{1/2} - \left( \frac{pH_2O^{(1)}}{\alpha} \right)^{1/2}}{\left( 1 + \frac{pH_2O^{(2)}}{\alpha} \right)^{1/2} - \left( \frac{pH_2O^{(2)}}{\alpha} \right)^{1/2}}. \quad (6)$$

The resulting  $\alpha$  values at different temperatures are shown in Table S1.

**Table S1** The values of  $\alpha$  calculated for  $La_{0.95}M_{0.05}ScO_{3-\delta}$  (M = Ca, Sr, Ba) at different temperatures

| T, °C | $\alpha$ , atm                     |                                    |                                    |
|-------|------------------------------------|------------------------------------|------------------------------------|
|       | $La_{0.95}Ca_{0.05}ScO_{3-\delta}$ | $La_{0.95}Sr_{0.05}ScO_{3-\delta}$ | $La_{0.95}Ba_{0.05}ScO_{3-\delta}$ |
| 800   | 0.1286                             | 0.4258                             | 0.8934                             |
| 700   | 0.0200                             | 0.1605                             | 0.3022                             |
| 600   | 0.0091                             | 0.0540                             | 0.1011                             |

Next, we can find  $\sigma_H$  and  $\sigma_O$  from the value of the total ionic conductivity ( $\sigma_i$ , the intercept with the vertical axis of  $\sigma_t = f(pO_2)^{1/4}$  experimental dependency) by combining equations (2) and (3) for two humidity values:

$$\frac{\sigma_i^{(1)}}{\sigma_i^{(2)}} = \frac{\sigma_H^{(1)} + \sigma_O^{(1)}}{\sigma_H^{(2)} + \sigma_O^{(2)}} = \frac{\sigma_H^* \left( \left( 1 + \frac{\alpha}{pH_2O^{(1)}} \right)^{1/2} - 1 \right) \left( \frac{pH_2O^{(1)}}{[(1+\alpha)^{1/2} - 1]} \right)^{1/2} + \sigma_O^* \left( \left( 1 + \frac{\alpha}{pH_2O^{(1)}} \right)^{1/2} - 1 \right) \frac{pH_2O^{(1)}}{\alpha}}{\sigma_H^* \left( \left( 1 + \frac{\alpha}{pH_2O^{(2)}} \right)^{1/2} - 1 \right) \left( \frac{pH_2O^{(2)}}{[(1+\alpha)^{1/2} - 1]} \right)^{1/2} + \sigma_O^* \left( \left( 1 + \frac{\alpha}{pH_2O^{(2)}} \right)^{1/2} - 1 \right) \frac{pH_2O^{(2)}}{\alpha}}. \quad (7)$$

## XRD and PDF

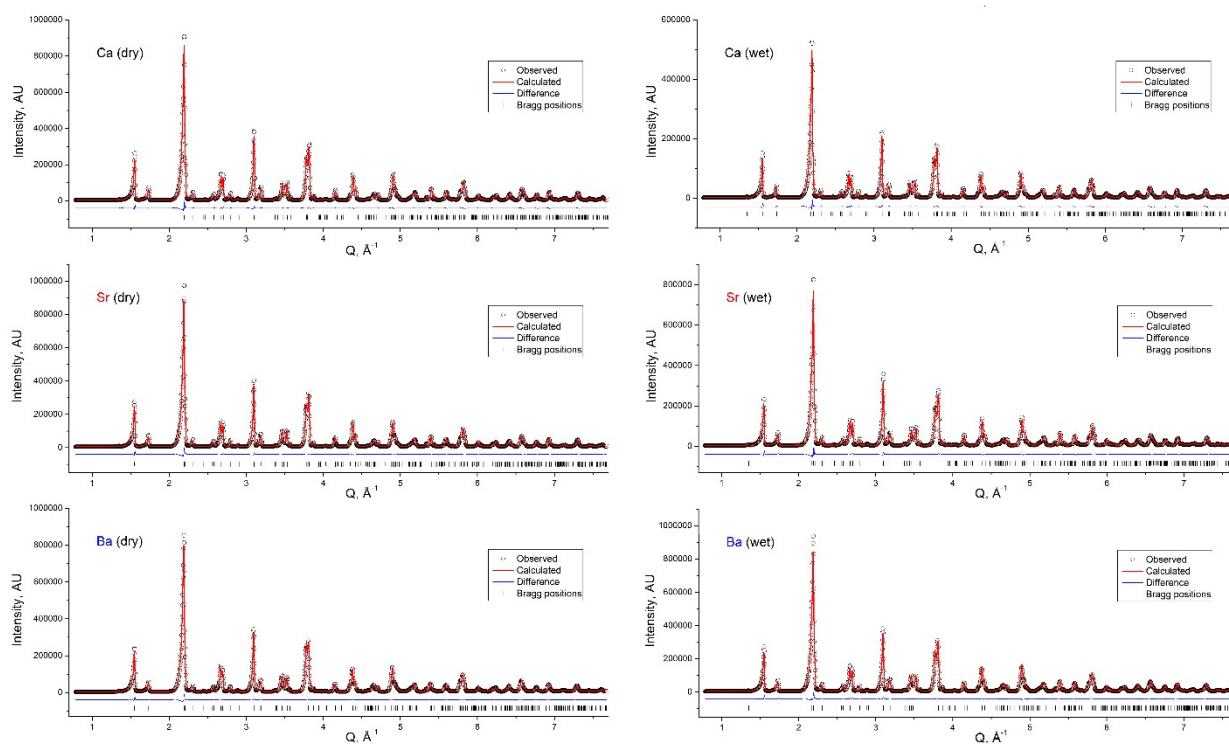

**Fig. S2** XRD patterns with Rietveld refinements for  $\text{La}_{0.95}\text{M}_{0.05}\text{ScO}_{3-\delta}$  ( $\text{M} = \text{Ca}, \text{Sr}, \text{Ba}$ ) samples in dry and saturated with water (wet) states

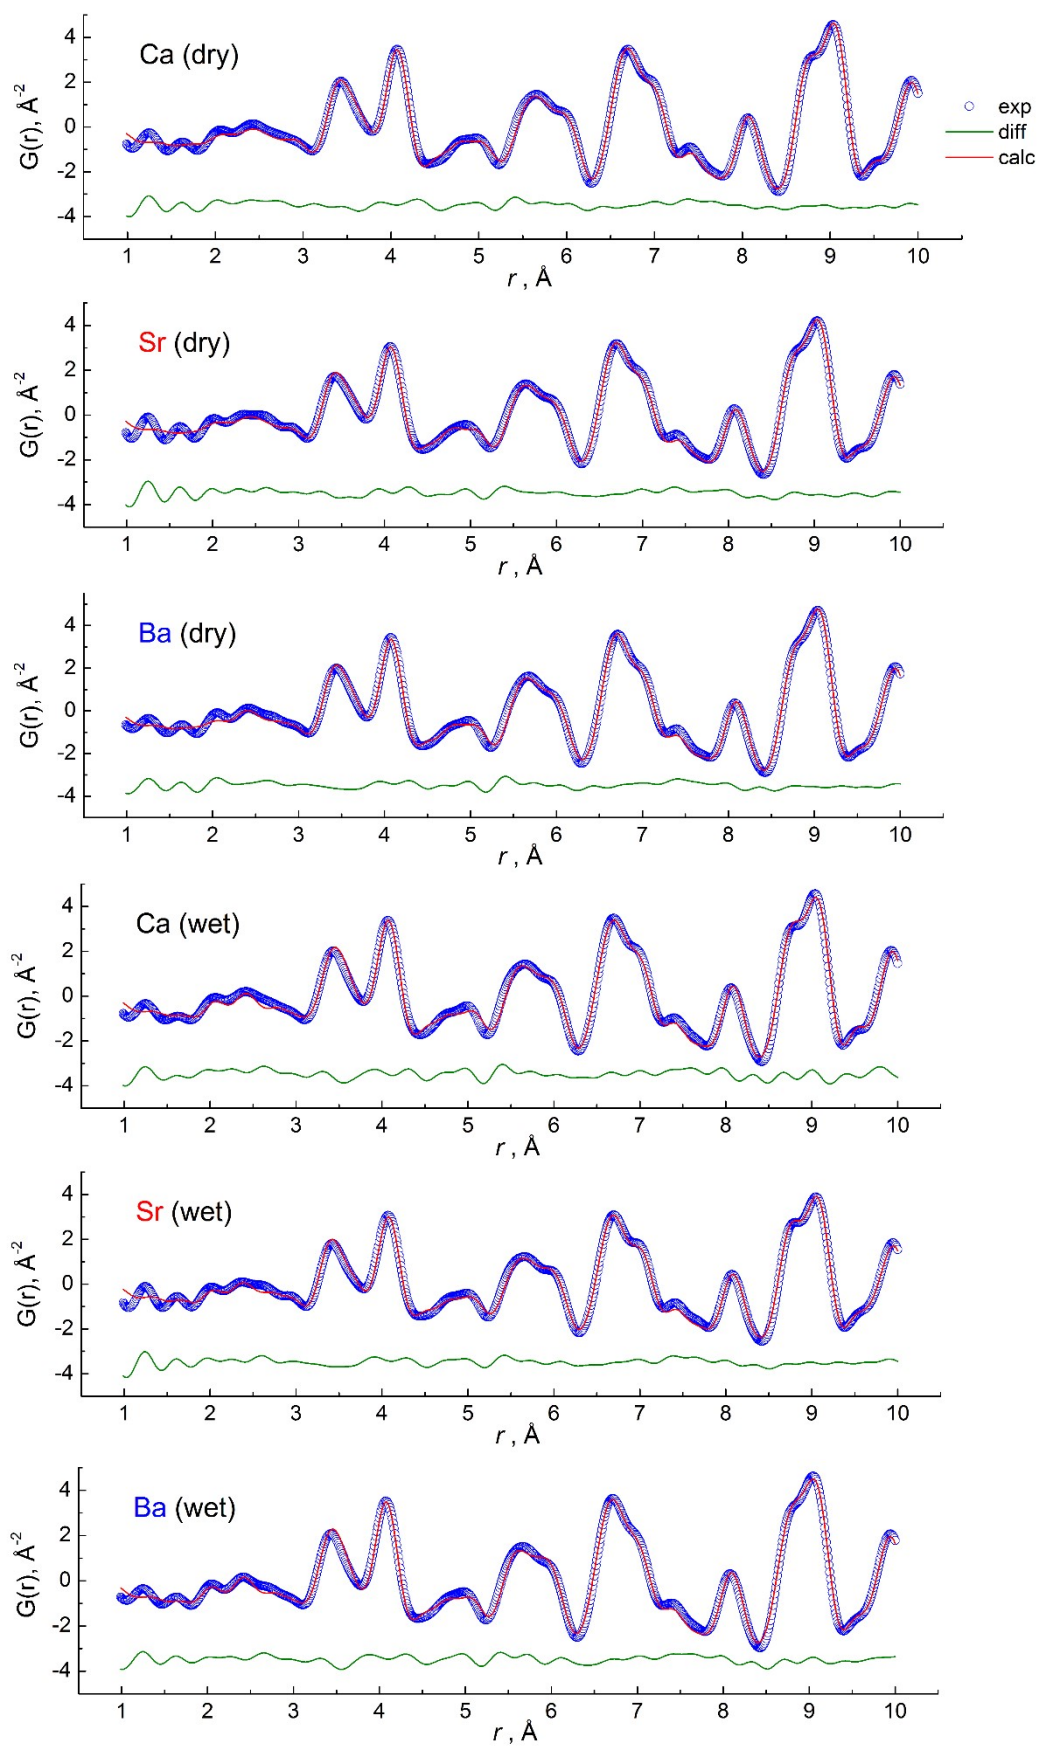

**Fig. S3** Refined local structure using X-ray PDF for  $\text{La}_{0.95}\text{M}_{0.05}\text{ScO}_{3-\delta}$  ( $\text{M} = \text{Ca}, \text{Sr}, \text{Ba}$ ) samples in dry and saturated with water (wet) states

Interatomic distances were calculated for the indicated atoms (according to the type of atom) up to 10 Å. There are 4 A-type positions, 4 B-type positions, 8 O1-type positions and 4 O2-type positions in the original unit cell. Atoms are numbered in the following order: La 1-4, Sc 5-8, O1 9-16 and O2 17-20. Table S2 presents the interatomic distances for the first coordination spheres of atoms, which corresponds to the lengths of chemical bonds.

**Table S2** Bond length according to PDF

| Pairs                                                                                                         | Bond length, Å |        |        |
|---------------------------------------------------------------------------------------------------------------|----------------|--------|--------|
|                                                                                                               | Ca             | Sr     | Ba     |
| <i>La-O</i>                                                                                                   |                |        |        |
| La(1)-O(18), La(2)-O(17), La(3)-O(20), La(4)-O(19)                                                            | 2.3347         | 2.3238 | 2.4613 |
| La(1)-O(13), La(1)-O(15), La(2)-O(14), La(2)-O(16),<br>La(3)-O(9), La(3)-O(11), La(4)-O(10), La(4)-O(12)      | 2.4422         | 2.4118 | 2.4315 |
| La(1)-O(19), La(2)-O(20), La(3)-O(17), La(4)-O(18)                                                            | 2.4679         | 2.5087 | 2.4319 |
| La(1)-O(10), La(1)-O(2), La(2)-O(9), La(2)-O(11),<br>La(3)-O(14), La(3)-O(16), La(4)-O(13), La(4)-O(15)       | 2.6957         | 2.7185 | 2.7326 |
| La(1)-O(9), La(1)-O(11), La(2)-O(10), La(2)-O(12),<br>La(3)-O(13), La(3)-O(15), La(4)-O(14), La(4)-O(16)      | 2.9115         | 2.9048 | 2.8935 |
| La(1)-O(19), La(2)-O(20), La(3)-O(17), La(4)-O(18)                                                            | 3.3646         | 3.3324 | 3.3684 |
| La(1)-O(14), La(1)-O(16), La(2)-O(13), La(2)-O(15),<br>La(3)-O(10), La(3)-O(12), La(4)-O(9), La(4)-O(11)      | 3.5562         | 3.5829 | 3.5601 |
| La(1)-O(18), La(2)-O(17), La(3)-O(20), La(4)-O(19)                                                            | 3.5816         | 3.5798 | 3.4605 |
| <i>Sc-O</i>                                                                                                   |                |        |        |
| Sc(5)-O(9), Sc(5)-O(13), Sc(6)-O(10), Sc(6)-O(14),<br>Sc(7)-O(11), Sc(7)-O(15), Sc(8)-O(12), Sc(8)-O(16)      | 1.9605         | 1.977  | 1.9890 |
| Sc(5)-O(17), Sc(5)-O(19), Sc(6)-O(18), Sc(6)-O(20),<br>Sc(11)-O(17), Sc(11)-O(19), Sc(12)-O(18), Sc(12)-O(20) | 2.1238         | 2.1178 | 2.1120 |
| Sc(5)-O(12), Sc(5)-O(16), Sc(6)-O(11), Sc(6)-O(15),<br>Sc(7)-O(10), Sc(7)-O(14), Sc(8)-O(9), Sc(8)-O(13)      | 2.2401         | 2.2396 | 2.2209 |

## References

- 1 J. R. Frade *Solid State Ionics*, 1995, **78**, 87–97. [DOI: 10.1016/0167-2738(95)00008-T]
- 2 H. D. Baek *Solid State Ionics*, 1998, **110**, 255–262. [DOI: 10.1016/S0167-2738(98)00138-6]
